# Supplementary material for: Structural basis for small molecule targeting of Doublecortin Like Kinase 1 with DCLK1-IN-1
Source: PubMed Central journal article supplement (PMC8452690; doi:10.1038/s42003-021-02631-y), 2021-09-20
Supplement: 42003_2021_2631_MOESM1_ESM.pdf [file 42003_2021_2631_MOESM1_ESM.pdf]

## Supplementary Information for

### Structural basis for small molecule targeting of Doublecortin Like Kinase 1 with DCLK1-IN-1

Onisha Patel<sup>1,2,\*</sup>, Michael J. Roy<sup>1,2</sup>, Ashleigh Kropp<sup>1,2</sup>, Joshua M. Hardy<sup>1,2</sup>, Weiwen Dai<sup>1,2</sup> and  
Isabelle S. Lucet<sup>1,2,\*</sup>

1. The Walter and Eliza Hall Institute of Medical Research, Parkville, Victoria 3052, Australia
2. Department of Medical Biology, University of Melbourne, Parkville, Victoria, 3052.

\*Correspondence: [lucet.i@wehi.edu.au](mailto:lucet.i@wehi.edu.au), [patel.o@wehi.edu.au](mailto:patel.o@wehi.edu.au)

**This pdf includes:**

**Supplementary Tables 1 to 2**

**Supplementary Figures 1 to 10**

Supplementary Table 1. List of DCLK1 residues that directly contact DCLK1-IN-1 and of the corresponding residues in ERK5, LRRK2 and PKA. Identical residues are highlighted.

|              |                                         |                     | Corresponding ERK5, LRRK2 and PKA residues |              |            |
|--------------|-----------------------------------------|---------------------|--------------------------------------------|--------------|------------|
|              |                                         |                     | <b>ERK5</b>                                | <b>LRRK2</b> | <b>PKA</b> |
| <b>DCLK1</b> | <b>Location</b>                         | <b>Interactions</b> |                                            |              |            |
| V404         | $\beta$ 2                               | side chain          | V69                                        | V1893        | V57        |
| A417         | $\beta$ 3                               | side chain          | A82                                        | A1904        | A70        |
| V449         | Loop connecting $\alpha$ C to $\beta$ 4 | side chain          | I117                                       | I1933        | V80        |
| M465         | Gatekeeper residue                      | main chain          | L137                                       | M1947        | M120       |
| E466         | Hinge region                            | main chain          | D138                                       | E1948        | E121       |
| L467         | Hinge region                            | main chain          | L139                                       | L1949        | Y122       |
| V468         | Hinge region                            | main chain          | M140                                       | A1950        | V123       |
| K469         | Hinge region                            | main chain          | E141                                       | S1951        | A124       |
| G472         | Hinge region                            | main chain          | S142                                       | G1953        | G125       |
| D475         | $\alpha$ D                              | side chain          | Q146                                       | R1957        | S130       |
| E515         | Loop connecting $\alpha$ E to $\beta$ 6 | main chain          | S186                                       | H1998        | E170       |
| L518         | $\beta$ 6                               | side chain          | L189                                       | L2001        | L173       |
| G532         | Start of the activation loop            | main chain          | G199                                       | A2016        | T183       |
| D533         | Start of the activation loop            | main chain          | D200                                       | D2017        | D184       |

Supplementary Table 2. SPR binding of inhibitors to DCLK1 – summary of fitted values

| Inhibitor     | Immobilised protein | Steady state fitting |                |     | Kinetic fitting |                                         |                 |                 |                |     |
|---------------|---------------------|----------------------|----------------|-----|-----------------|-----------------------------------------|-----------------|-----------------|----------------|-----|
|               |                     | $K_D$ (nM)           | $R_{max}$ (RU) | N = | $K_D$ (nM)      | $k_{on}$ (1/Ms)<br>(x 10 <sup>5</sup> ) | $k_{off}$ (1/s) | $t_{1/2}$ (sec) | $R_{max}$ (RU) | N = |
| DCLK1-IN-1    | DCLK1 FL1Δ D511N    | 70 ± 4               | 12 ± 1         | 4   | 53 ± 5          | 5.1 ± 0.3                               | 0.027 ± 0.001   | 26 ± 1          | 11 ± 1         | 4   |
| FMF-03-055-01 | DCLK1 FL1Δ D511N    | 24 ± 1               | 13 ± 1         | 3   | 13 ± 2          | 11 ± 4                                  | 0.014 ± 0.006   | 50 ± 20         | 10 ± 1         | 3   |
| XMD8-85       | DCLK1 FL1Δ D511N    | 14 ± 1               | 12 ± 1         | 3   | 8 ± 1           | 12.8 ± 0.5                              | 0.010 ± 0.001   | 67 ± 6          | 8 ± 1          | 3   |
| DCLK1-NEG     | DCLK1 FL1Δ D511N    | >10000               |                | 3   | ND              |                                         |                 |                 |                | 3   |
| DCLK1-IN-1    | DCLK1 FL1Δ WT       | 145 ± 35             | 7 ± 1          | 4   | 83 ± 22         | 6 ± 2                                   | 0.04 ± 0.01     | 17 ± 4          | 6 ± 1          | 4   |
| FMF-03-055-01 | DCLK1 FL1Δ WT       | 28 ± 2               | 6 ± 1          | 3   | 12 ± 2          | 9.6 ± 0.6                               | 0.011 ± 0.001   | 60 ± 1          | 4 ± 1          | 3   |
| XMD8-85       | DCLK1 FL1Δ WT       | 12 ± 2               | 4 ± 1          | 3   | 7.5 ± 0.3       | 22 ± 2                                  | 0.016 ± 0.001   | 44 ± 2          | 3 ± 1          | 3   |
| DCLK1-NEG     | DCLK1 FL1Δ WT       | >10000               |                | 3   | ND              |                                         |                 |                 |                | 3   |

Errors are SEM, ND = not determined

$K_D$ , dissociation constant;  $k_{on}$ , on-rate;  $k_{off}$ , off-rate;  $t_{1/2}$ , dissociative half-life for the protein/inhibitor complex (calculated from the fitted dissociation rate constant ( $k_{off}$ ), according the equation  $t_{1/2} = \ln 2/k_{off}$ ); N is the number of independent experiments.

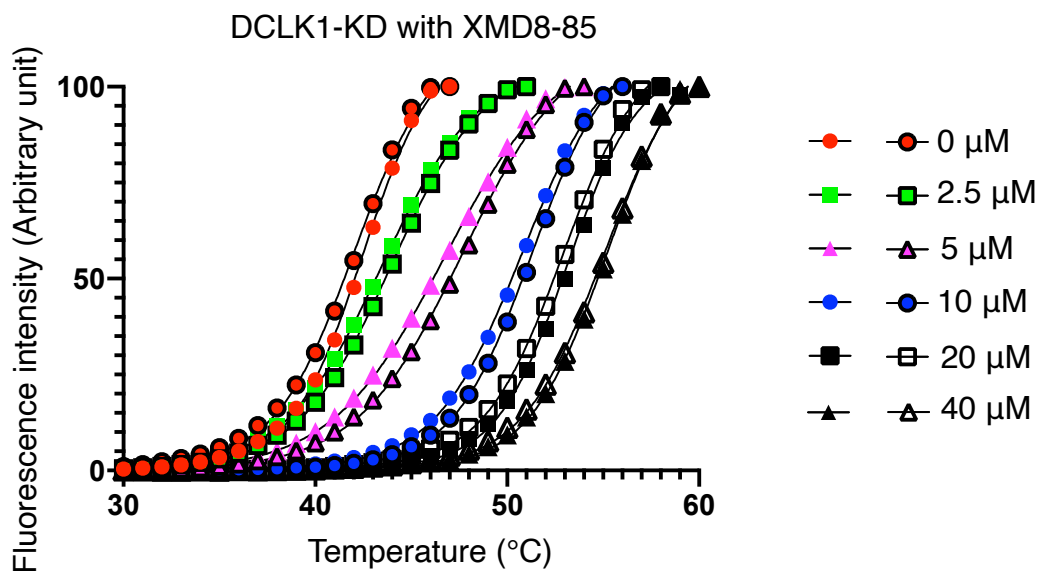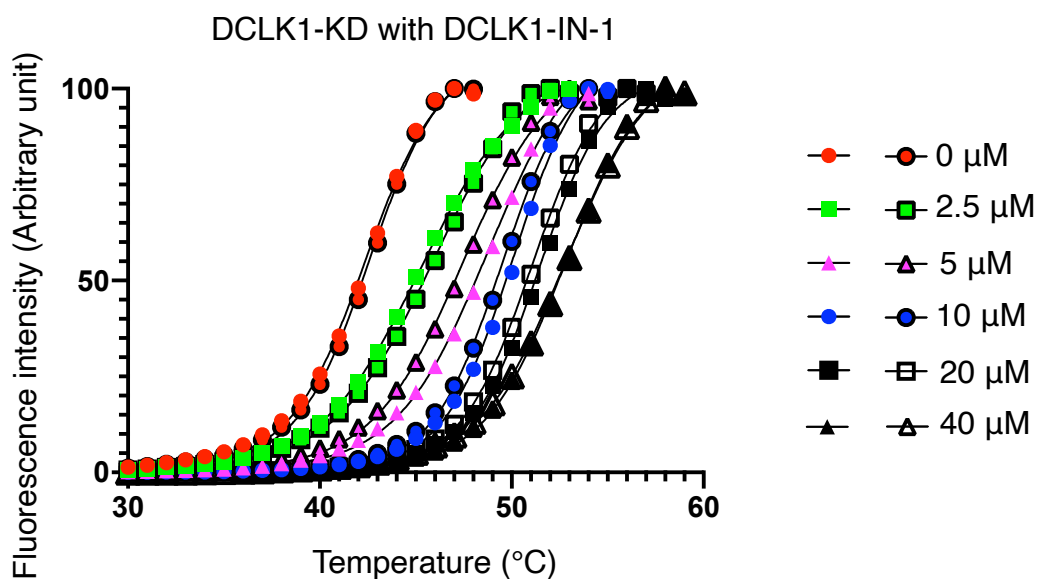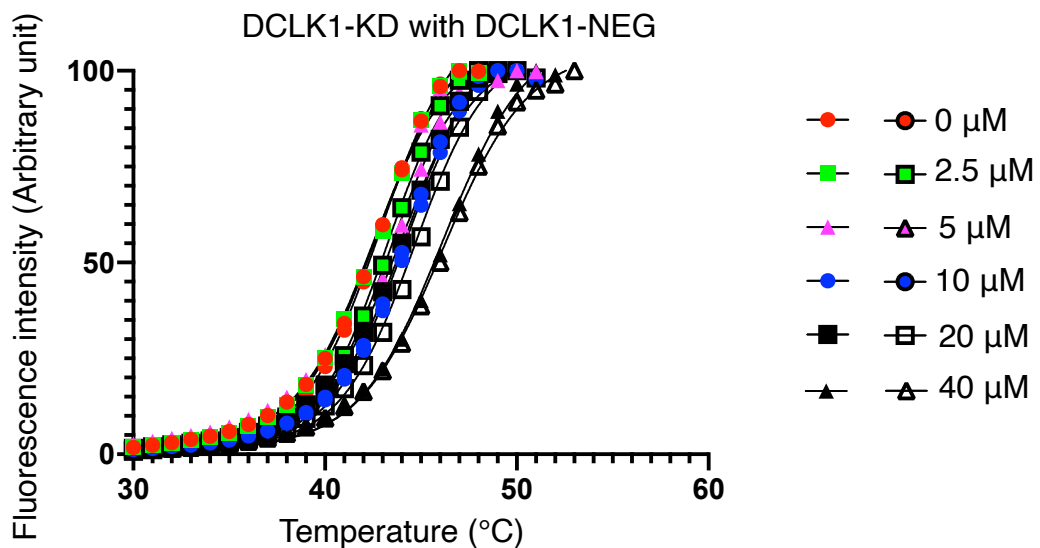

Supplementary Figure 1. Thermal shift assay comparing melting profile of XMD8-85, DCLK1-IN-1 and DCLK1-NEG when bound to DCLK1-KD. Inhibitor concentration tested is as shown. Each curve represents a single inhibitor concentration and each inhibitor concentration is shown in duplicates.

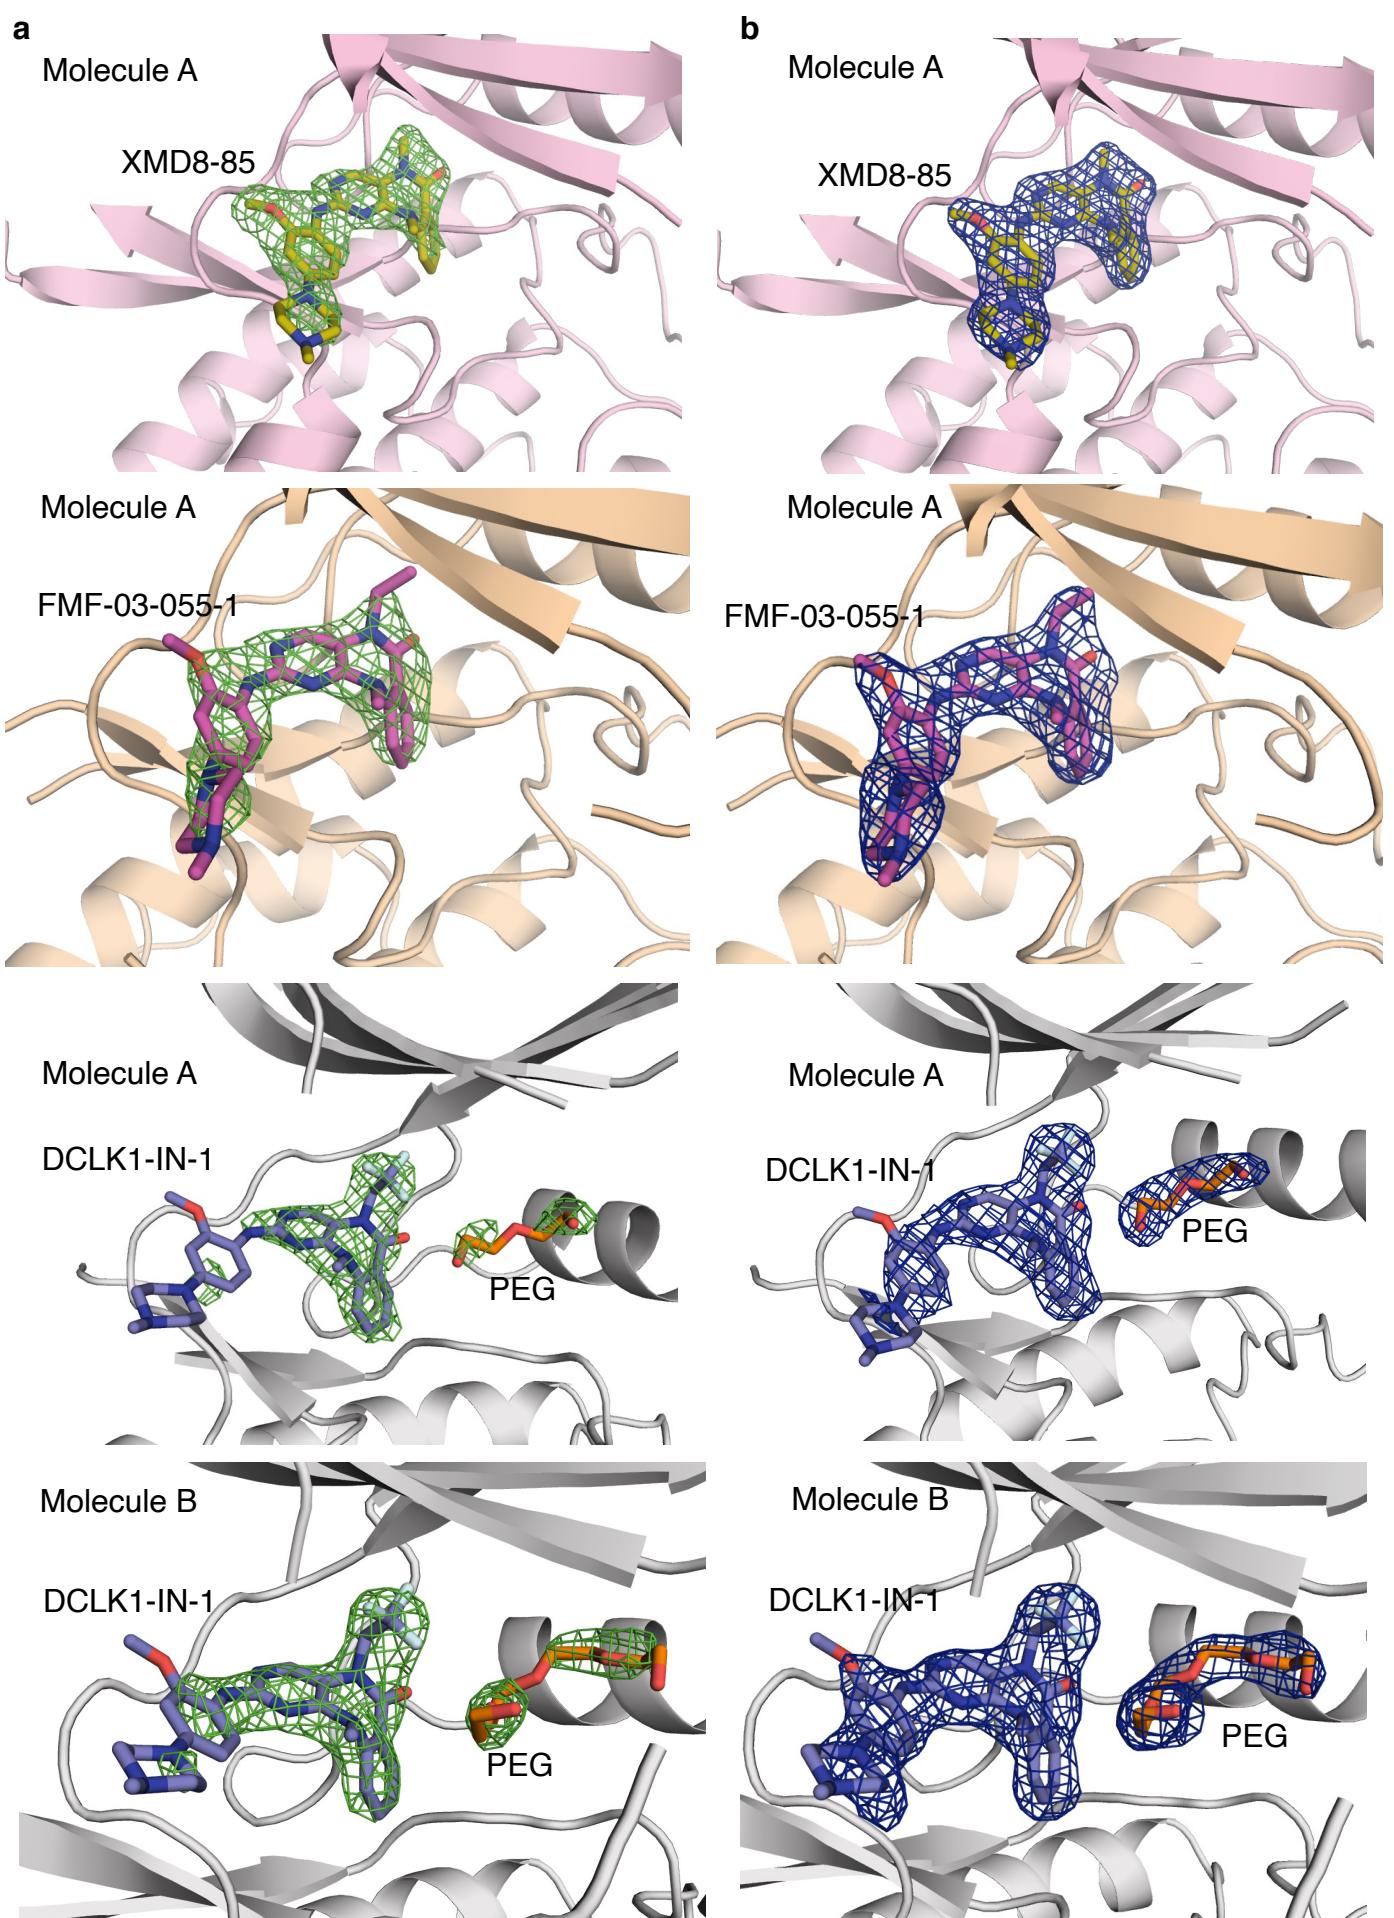

Supplementary Figure 2. **a** Unbiased Fo-Fc density map contoured at  $3\sigma$  before refinement and model building. **b** 2Fo-Fc map after refinement and model building contoured at  $1\sigma$  for XMD8-85, FMF-03-055-1 and DCLK1-IN-1 bound to DCLK1. For DCLK1-KD:DCLK1-IN-1, maps for DCLK1-IN-1 and PEG from both molecules (A and B) within the asymmetric unit are shown.

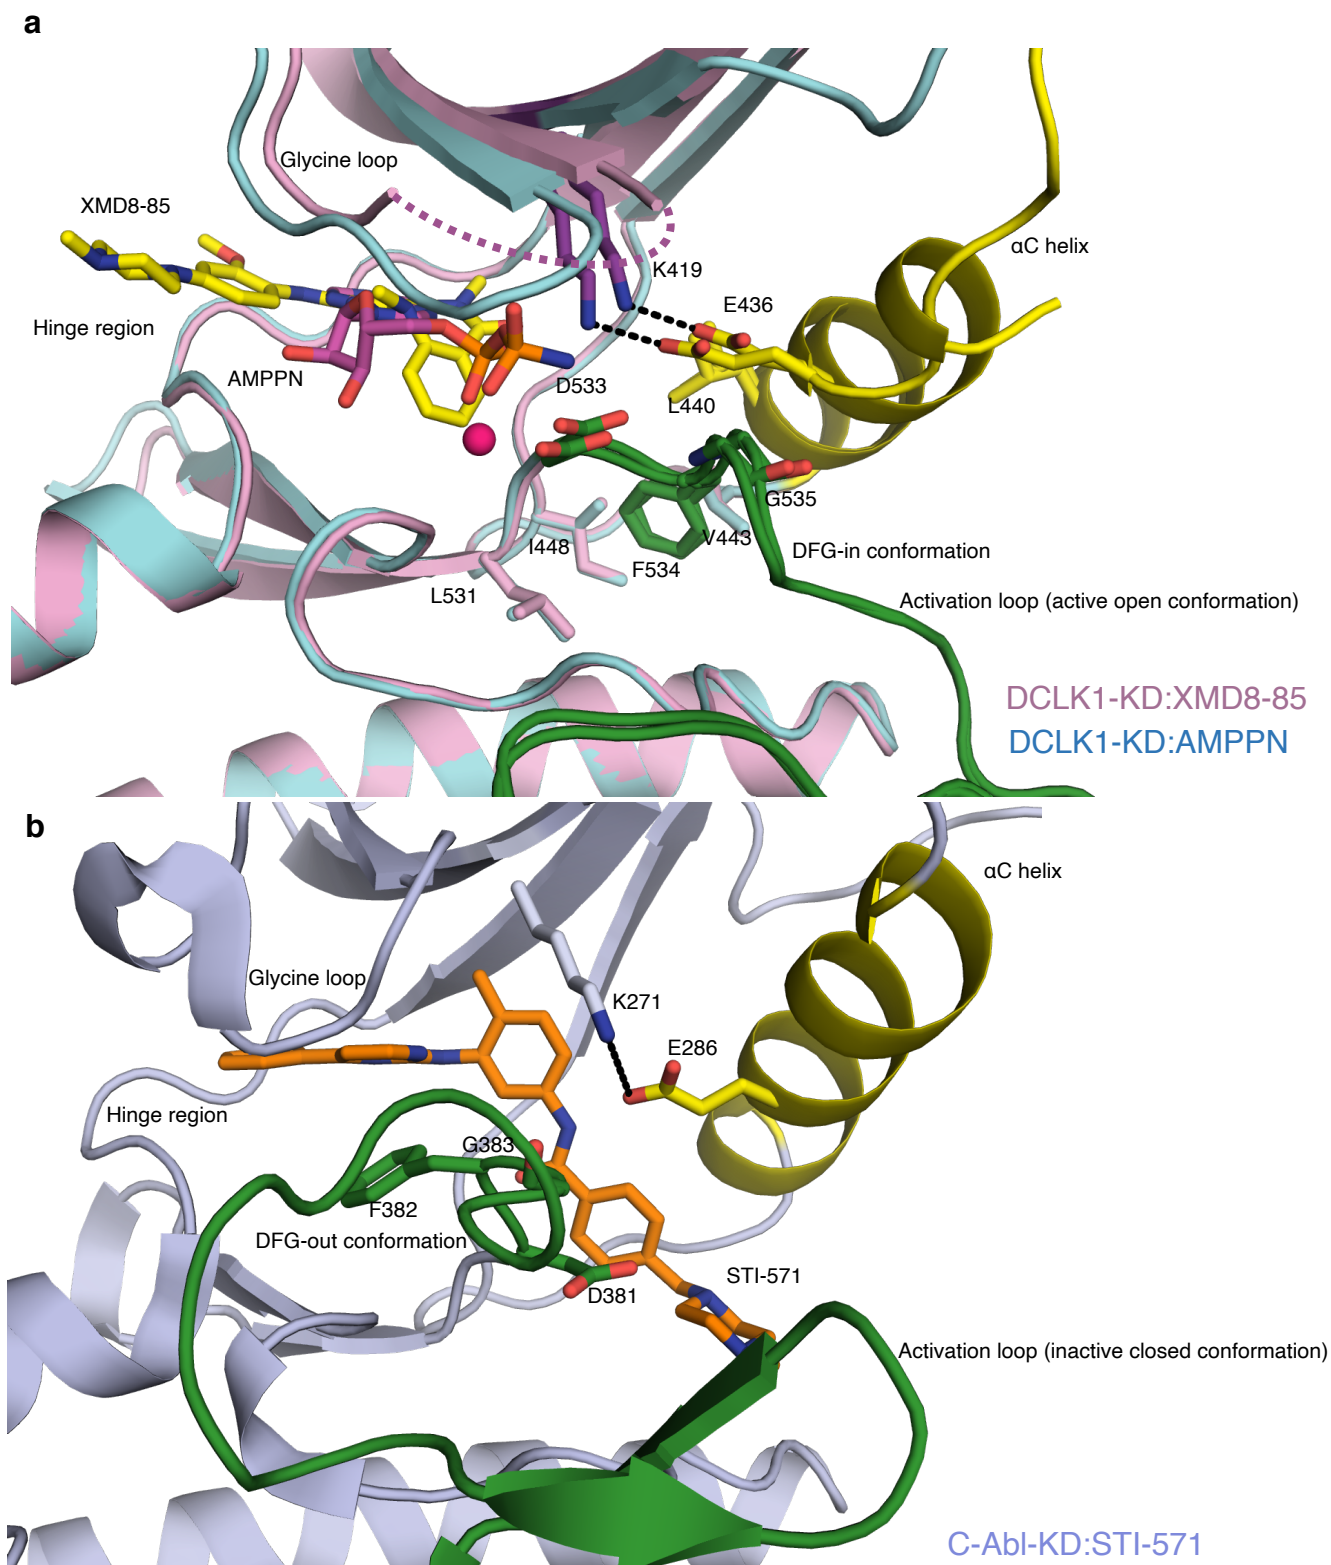

Supplementary Figure 3. **a** Overlay of DCLK1-KD:AMPPN (PDB 5JZJ) and DCLK1-KD: XMD8-85 crystal structures which adapts the kinase active conformation with DFG motif in the DFG-in conformation and activation loop in the active open conformation. **b** C-Abl-KD:STI-571 (PDB 1IEP) with DFG-out conformation and activation loop in the inactive closed conformation.

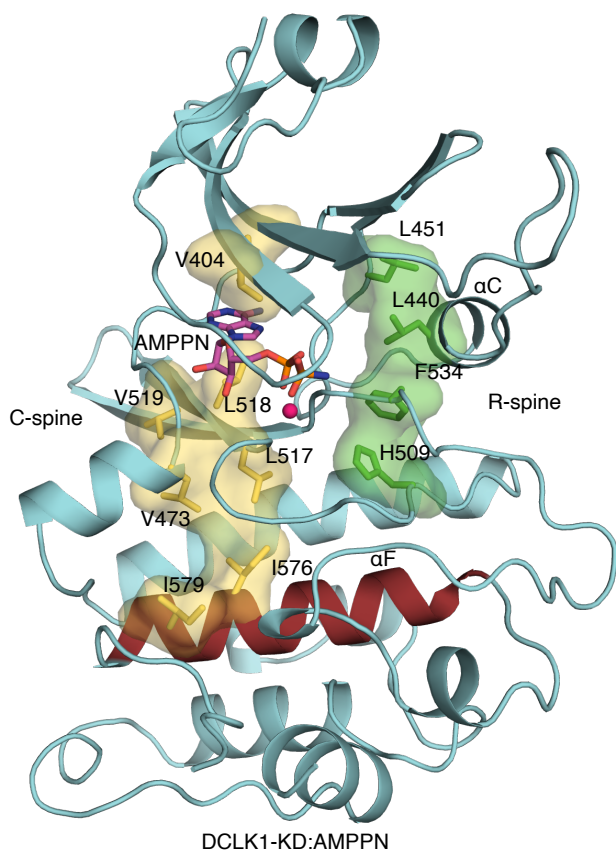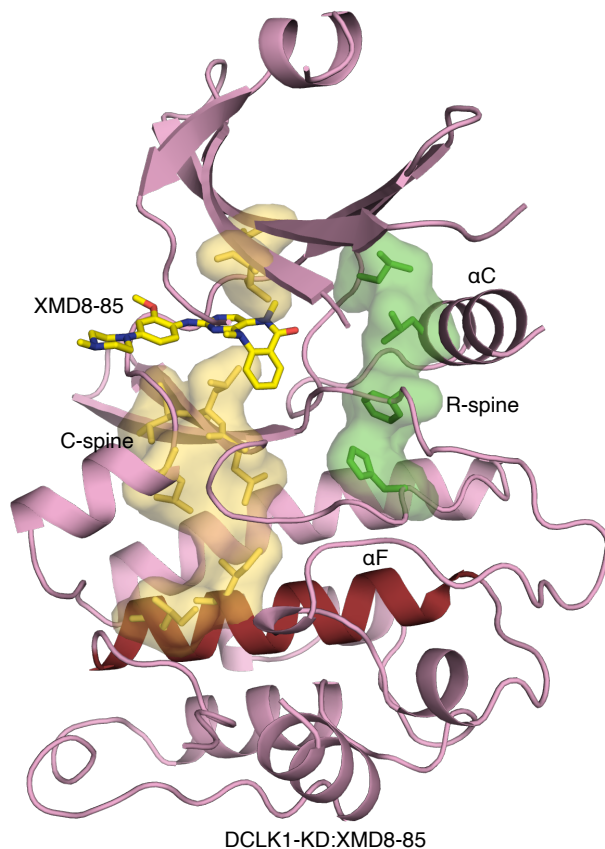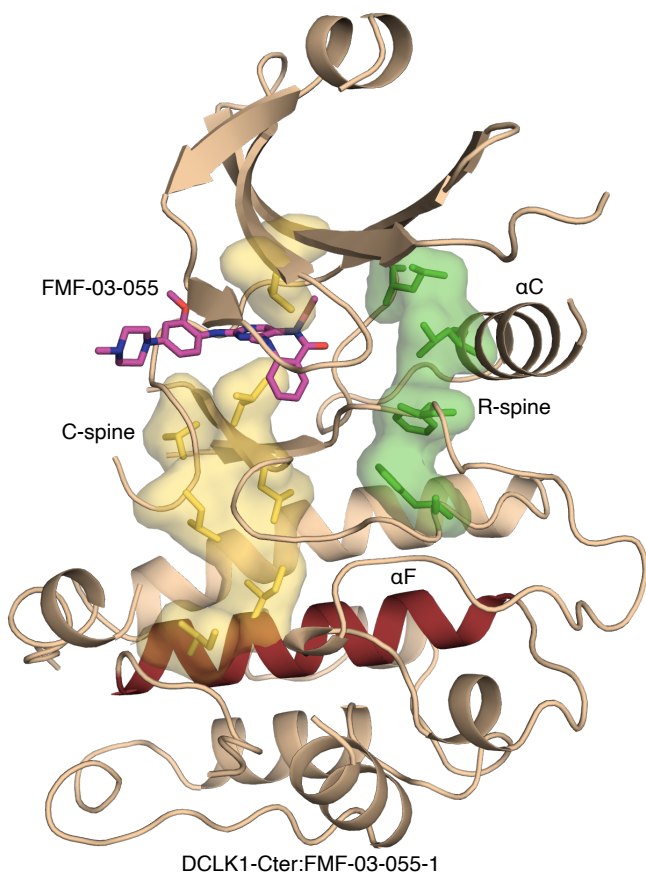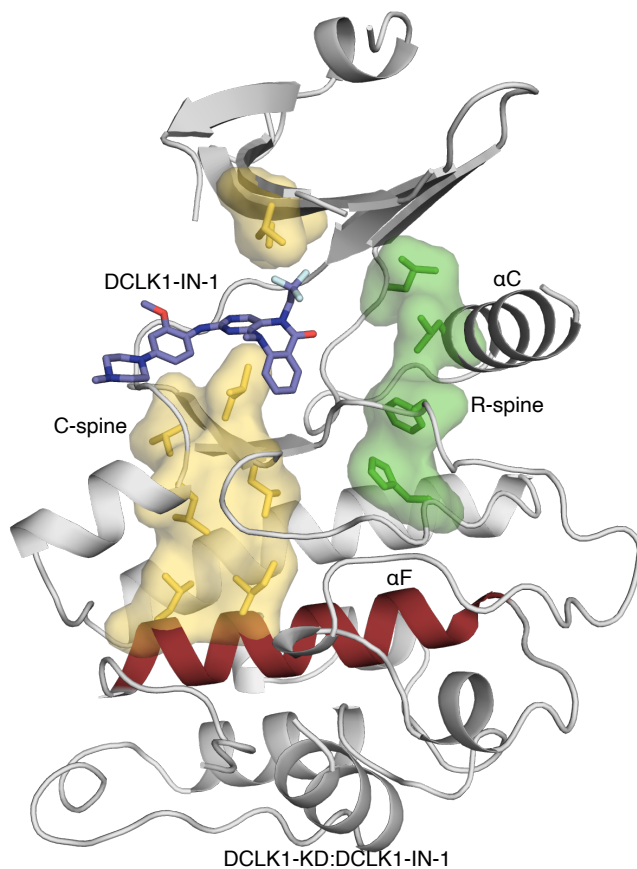

Supplementary Figure 4. Alignment of regulatory (R) spine (residues Val404, Ala417, Leu473, Leu517, Leu518, Val 519, Ile576, Leu580 and catalytic (C) spine (residues Leu440, Leu451, His509 and Phe534) for DCLK1 bound to AMPN (PDB 5JZJ), XMD8-85, FMF-03-055-1 and DCLK1-IN-1. R-spine is shown in green and C-spine is shown in yellow.

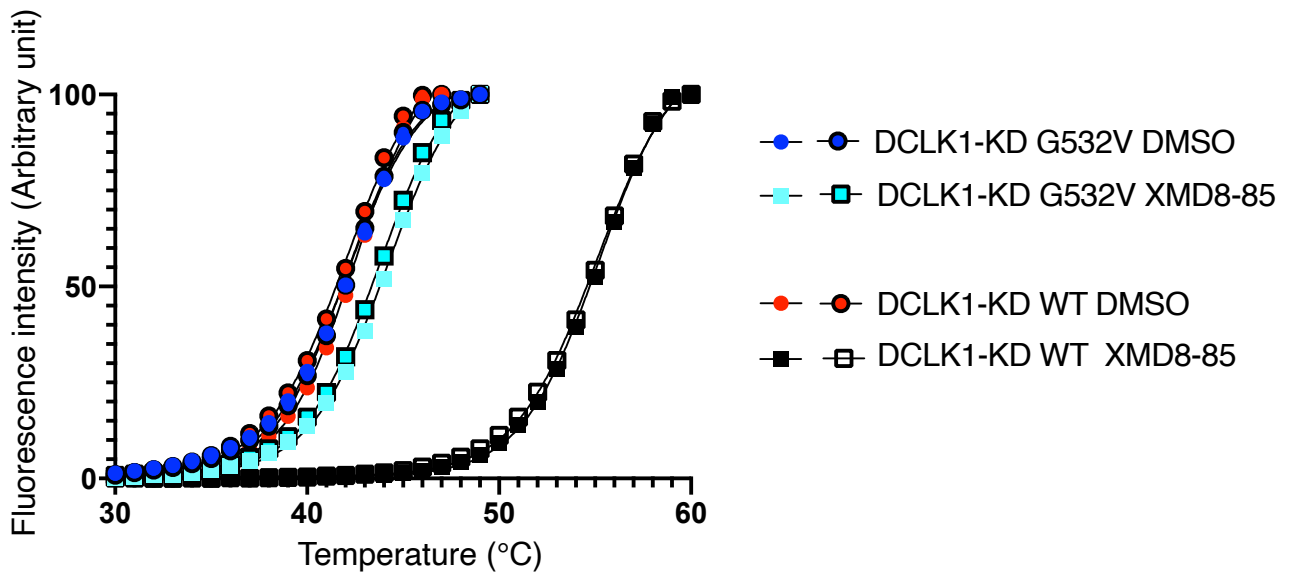

Supplementary Figure 5. Thermal shift assay comparing melting profile of DCLK1-KD WT and DCLK1-KD G532V with XMD8-85 (40  $\mu$ M) and DMSO control. Curves for each protein is shown in duplicates.



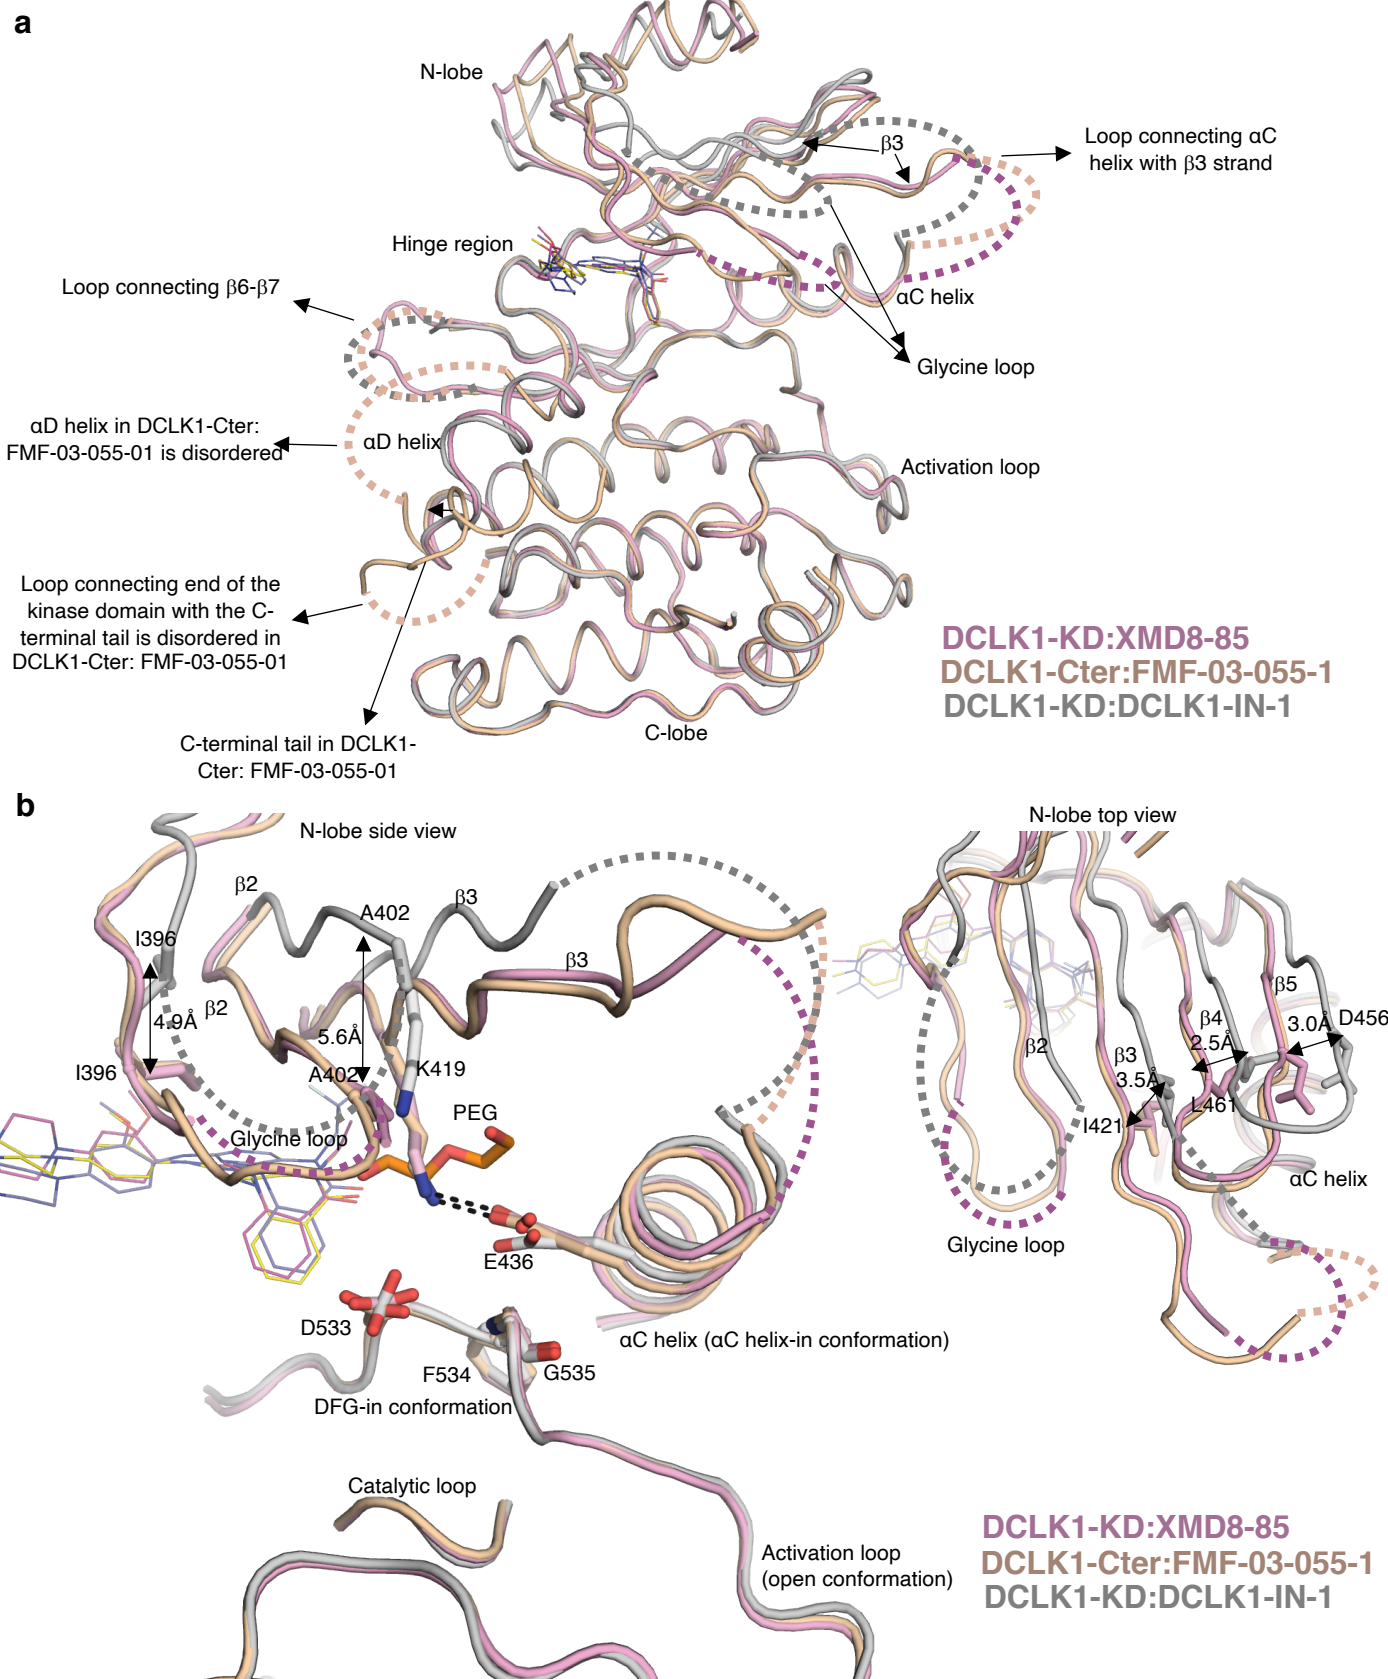

Supplementary Figure 6. **a** Overlay of one molecule of DCLK1-KD: XMD8-85, DCLK1-Cter:FMF-03-055-1 and DCLK1-KD:DCLK1-IN-1. Disordered loops are highlighted in dashed lines. The root mean square deviation after superposition of DCLK1-KD:DCLK1-IN-1 with DCLK1-KD:XMD8-85 is 0.261Å over 190 C $\alpha$  atoms and with DCLK1-Cter:FMF-03-055-1 is 0.316Å over 175 C $\alpha$  atoms. **b** Left, the opening of the ATP binding pocket in DCLK1-KD:DCLK1-IN-1 results in an upward shift of up to 5Å near the glycine loop highlighted at the C $\alpha$  atom of Ile396 at the start of the glycine loop and Ala402 at the end of the glycine loop. The position of the  $\alpha C$  helix, the DFG motif, the activation loop and the catalytic loop does not change in the three structures. Right, the N-lobe in DCLK1-KD:DCLK1-IN-1 undergoes a twist that shifts the position of  $\beta$  strands between 2.5-3.5Å compared to DCLK1-KD:XMD8-85 and DCLK1-Cter:FMF-03-055-1.

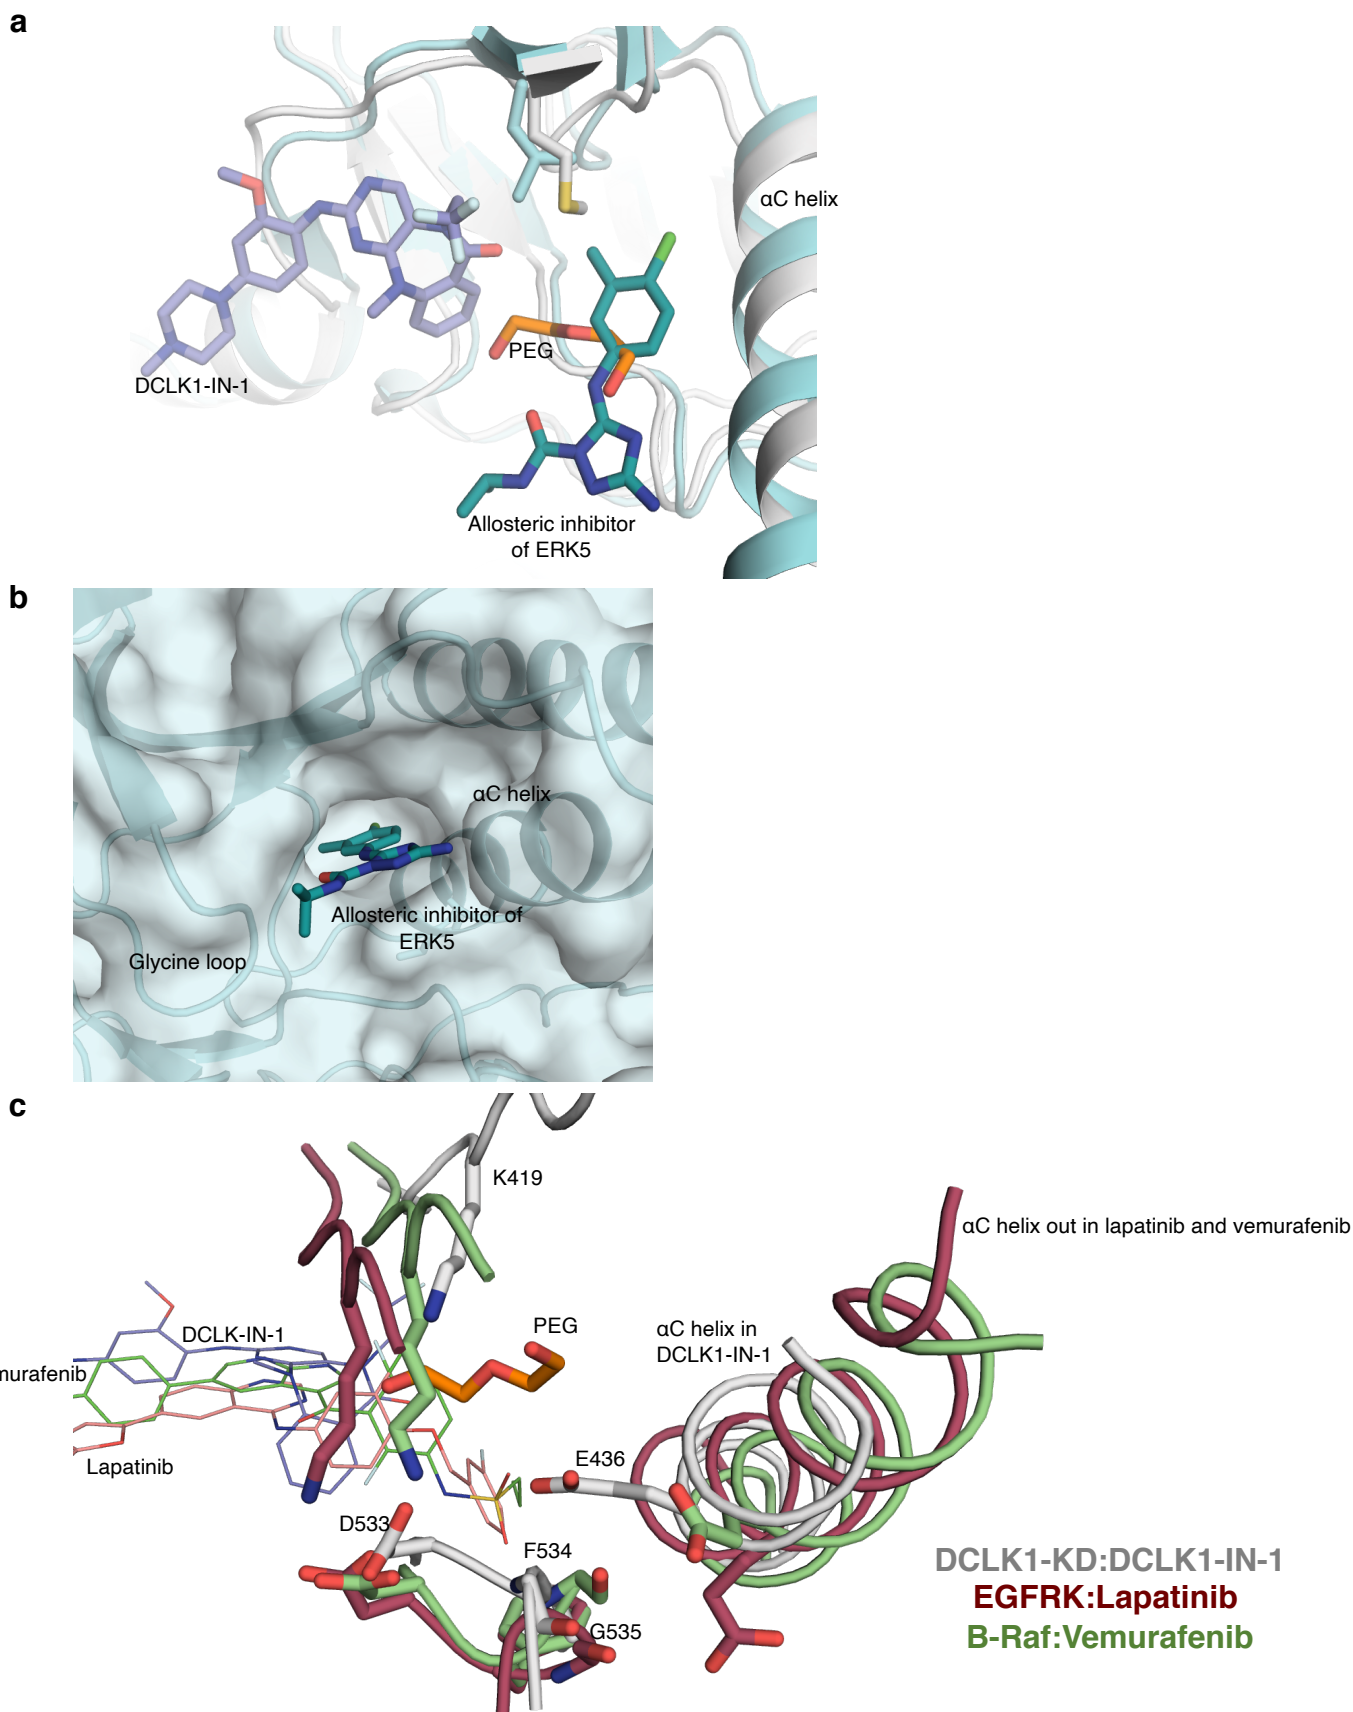

Supplementary Figure 7. **a** Overlay of DCLK1-KD:DCLK1-IN-1 with ERK5 structure bound to an allosteric inhibitor (PDB 4ZSJ). The position of the PEG molecule in DCLK1-KD:DCLK1-IN-1 aligns with the position of the allosteric inhibitor in ERK5. **b** The crystal structure of ERK5 with an allosteric inhibitor (PDB 4ZSJ) showing the allosteric pocket stabilised in between the glycine loop and the  $\alpha$ C helix. **c** Overlay of DCLK1-KD:DCLK1-IN-1 with type 1.5 inhibitors, EGFRK:Lapatinib (PDB 1XKK) and B-Raf:Vemurafenib (PDB 3OG7) to highlight the disruption of canonical salt bridge between glutamate and lysine. EGFRK:Lapatinib and B-Raf:Vemurafenib has the  $\alpha$ C helix out conformation while DCLK1-KD:DCLK1-IN-1 has the  $\alpha$ C helix in conformation.

**a**DCLK1-FL1 $\Delta$  D511N with DCLK1-NEG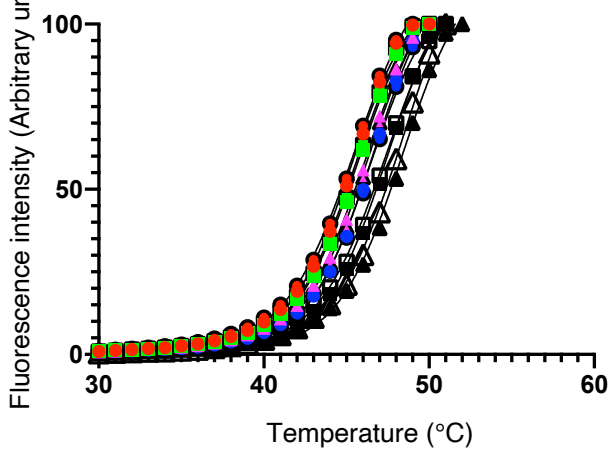DCLK1-FL1 $\Delta$  WT with DCLK1-NEG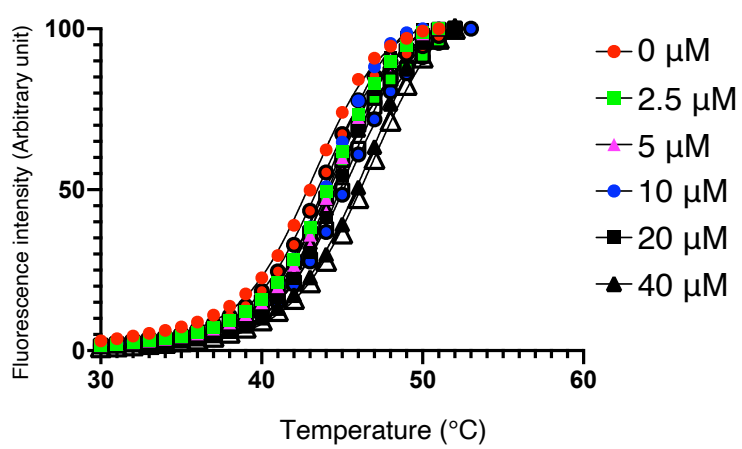DCLK1-FL1 $\Delta$  D511N with DCLK1-IN-1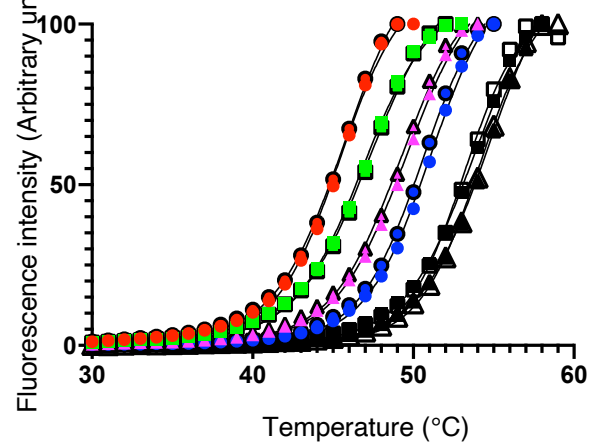DCLK1-FL1 $\Delta$  WT with DCLK1-IN-1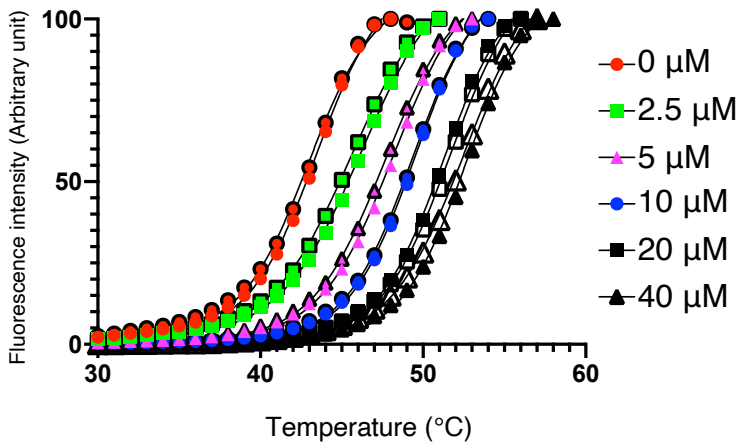**b**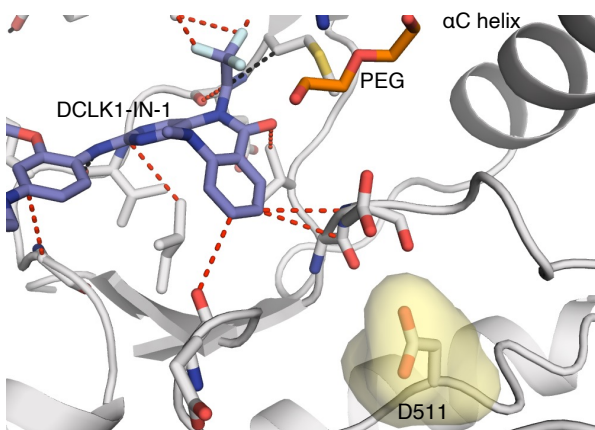

Supplementary Figure 8. **a** Thermal shift assay comparing melting profile of DCLK1-IN-1 and DCLK1-NEG with DCLK1-FL1 $\Delta$  WT and DCLK1-FL1 $\Delta$  D511N. Each curve represents a single concentration and each concentration is shown in duplicates. **b** Location of D511N mutant (yellow) in the catalytic loop to show inhibitor binding with this mutant will be unaffected.

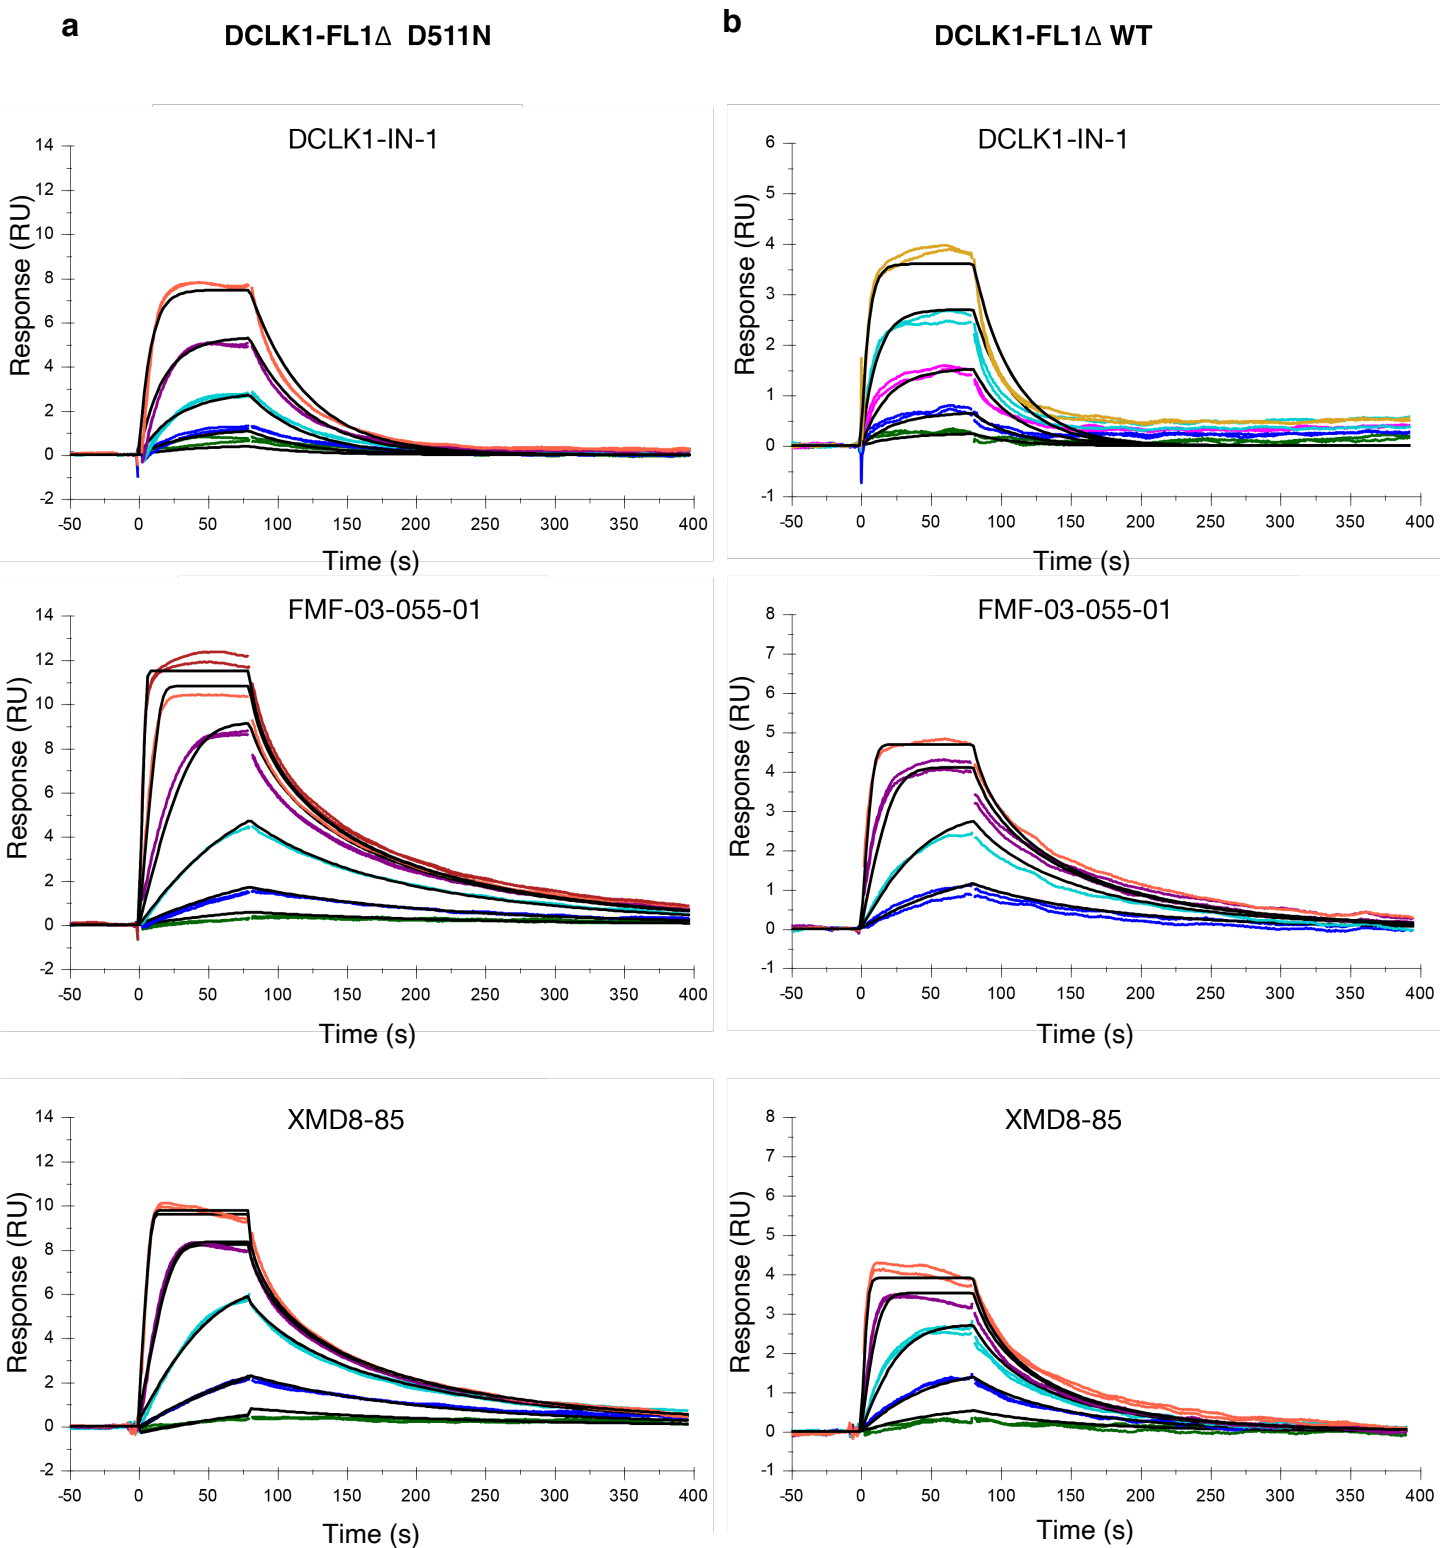

Supplementary Figure 9. SPR kinetic fitting. **a** Representative fitted SPR sensorgrams for DCLK1-IN-1, FMF-03-055-1 or XMD8-85 binding to immobilised DCLK1-FL1 $\Delta$  D511N. **b** Representative fitted SPR sensorgrams for DCLK1-FL1 $\Delta$  WT. Black lines represent kinetic fitting using a 1:1 binding model. Data represents an average of either four (DCLK1-IN-1) or three (FMF-03-055-01 and XMD8-85) independent experiments. Mean fitted values are listed in Supplementary Table 2.

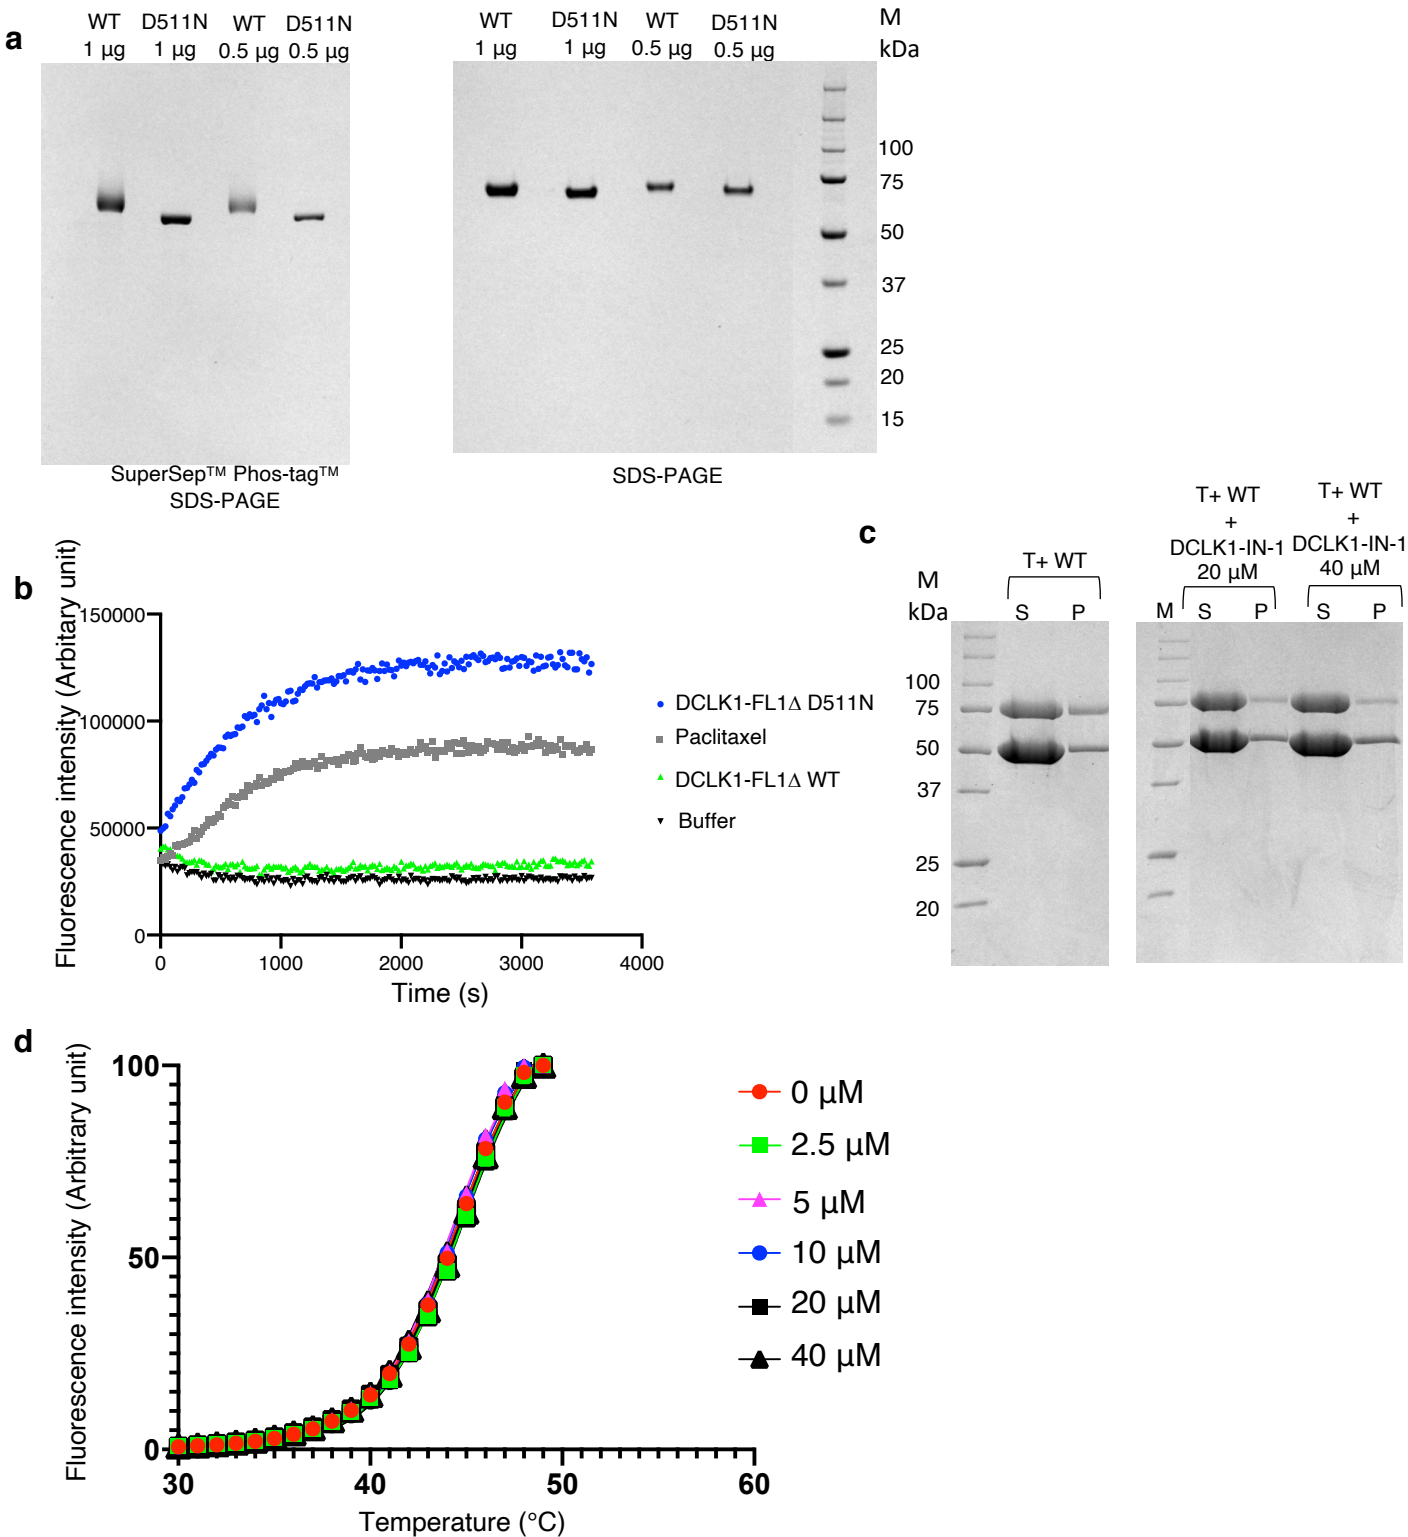

Supplementary Figure 10. **a** SuperSep™ Phos-tag™ 12.5% SDS-PAGE gel (left) and SDS-PAGE analysis (right) of DCLK1-FL1Δ WT and DCLK1-FL1Δ D511N. 1 µg and 0.5 µg samples were loaded on the gel. An SDS-PAGE gel with molecular weight markers was run in parallel to make sure the proteins for the phos-tag analysis were not degraded. **b** Tubulin polymerisation assay. Tubulin was incubated alone (control buffer), with paclitaxel (3 µM), or with DCLK1-FL1Δ WT (4 µM) and DCLK1-FL1Δ D511N (4 µM). This curve is a representation of samples tested in duplicates and in two independent experiments. **c** SDS-PAGE gel analysis of pellet (P) and supernatant (S) fractions following tubulin polymerisation in the presence of DCLK1-FL1Δ WT incubated with DCLK1-IN-1 at 20 and 40 µM. DCLK1-FL1Δ WT (WT) was incubated with DCLK1-IN-1 before adding tubulin (T). This gel is a representation of samples tested in two independent experiments. **d** Thermal shift assay to show that DCLK1-FL1Δ D511N does not bind tubulin destabilisation drug, nocodazole (40 µM). This curve is a representation of samples tested in duplicates.
